# Supplementary material
Source: PubMed Central journal article supplement (PMC10066923)

**Supplementary Tables and Figures for “African Ancestry GWAS of Dementia in a Large Military Cohort Identifies Significant Risk Loci”**

**by Richard Sherva et al.**

**Contents:**

Supplementary Tables 1 to 7.

Supplementary Figures 1 to 6.

**Supplemental Table 1. ICD Codes used for ADRD Case/Control Definitions**

| Diagnostic Category             | ICD Codes                                                                                                                                                                                                                                                                                                                                                                                                                                                                                                                                                                                                                                           |
|---------------------------------|-----------------------------------------------------------------------------------------------------------------------------------------------------------------------------------------------------------------------------------------------------------------------------------------------------------------------------------------------------------------------------------------------------------------------------------------------------------------------------------------------------------------------------------------------------------------------------------------------------------------------------------------------------|
| Alzheimer’s Disease             | ICD-9: 331.0; ICD-10: G30.1, 30.8, and 30.9.                                                                                                                                                                                                                                                                                                                                                                                                                                                                                                                                                                                                        |
| Non-Specific Dementia           | ICD 9 Codes<br>294.20: Unspecified dementia without behavioral disturbance<br>294.21: Unspecified dementia with behavioral disturbance<br>294.8: Other persistent mental disorders/Other specified organic brain syndromes<br>290.0: Senile dementia uncomplicated<br>290.20: Senile dementia with delusional features,<br>290.21: Senile dementia with depressive features<br>290.3: Senile dementia with delirium<br>331.2: Senile degeneration of the brain<br>ICD 10 codes<br>F03.90: Unspecified dementia without behavioral disturbance<br>F03.91 Unspecified dementia with behavioral disturbance<br>G31.1: Senile degeneration of the brain |
| Related Dementia                | 290.40, 290.41, 290.42, 290.43, F01.50, F01.51: Vascular dementia<br>331.82; G31.83: Lewy Body dementia<br>331.1, G31.0; 331.19, G31.09: Frontotemporal/Other Fronto-Dementia<br>290.10, 290.10, 290.11, 290.12, 290.13, G30.0: Presenile/Early onset dementia<br>331.5, G91.2: Idiopathic Normal Pressure Hydrocephalus                                                                                                                                                                                                                                                                                                                            |
| Other Dementias                 | 333.4; G10: Huntington’s Disease<br>332, G20: Parkinson’s Disease Dementia<br>A81.00: Creutzfeldt-Jakob Disease<br>331.11, G31.01: Pick’s Disease of the Brain<br>F10.96: Korsakoff Syndrome<br>294.10, 294.11 Dementia in conditions classified elsewhere with/without behavioral disturbance.<br>F02.80, F2.81 Dementia in other diseases classified elsewhere with/without behavioral disturbance                                                                                                                                                                                                                                                |
| Mild Cognitive Impairment (MCI) | ICD 9: 331.83; ICD10: G31.84                                                                                                                                                                                                                                                                                                                                                                                                                                                                                                                                                                                                                        |

Note: To qualify as an ADRD case, a participant must have received at least two ICD codes from any of the “Alzheimer’s Disease”, “Non-specific Dementia”, or “Related Dementia” categories. Controls must not have received any of the ADRD ICD codes, any codes from the “Other Dementias” or “Mild Cognitive Impairment” category or have been prescribed AD medication.

**Supplementary Table 2:** Associations effect sizes and significance for the association between ApoE genotypes and AD, ADRD, and proxy dementia in African ancestry (AFR) MVP participants.

| APOE Genotype           | 3/3 (reference) | 2/2         | 2/3          | 2/4                   | 3/4                    | 4/4                    |
|-------------------------|-----------------|-------------|--------------|-----------------------|------------------------|------------------------|
| N (ADRD cases/controls) | 10,167          | 130         | 2366         | 701                   | 6036                   | 854                    |
| N (%) ADRD cases        | 1950 (17.52%)   | 29 (19.33%) | 437 (16.74%) | 170 (22.25%)          | 1502 (22.74%)          | 334 (36.07%)           |
| ADRD OR vs 33           | NA              | 1.20        | 0.93         | 1.45                  | 1.44                   | 2.90                   |
| Pvalue                  | NA              | 0.43        | 0.25         | 0.0001                | $2.66 \times 10^{-18}$ | $3.18 \times 10^{-43}$ |
| AD strict OR            | NA              | 0.35        | 0.81         | 1.68                  | 2.06                   | 5.52                   |
| Pvalue                  | NA              | 0.30        | 0.21         | 0.02                  | $3.45 \times 10^{-15}$ | $1.41 \times 10^{-46}$ |
| Maternal OR             | NA              | 0.78        | 0.99         | 1.43                  | 1.37                   | 2.07                   |
| Pvalue                  | NA              | 0.31        | 0.88         | $1.82 \times 10^{-5}$ | $1.64 \times 10^{-16}$ | $2.19 \times 10^{-25}$ |
| Paternal OR             | NA              | 0.97        | 1.0004       | 1.03                  | 1.30                   | 1.43                   |
| Pvalue                  | NA              | 0.91        | 0.99         | 0.83                  | $3.72 \times 10^{-7}$  | 0.0009                 |

OR=odds ratio

**Supplementary table 3:** Suggestive ( $p < 5 \times 10^{-7}$ ) associations between common variants and ADRD in an APOE E4 adjusted analysis meta-analysis

| Chr | Position | SNP         | Effect Allele | OR   | P-value  | Gene         |
|-----|----------|-------------|---------------|------|----------|--------------|
| 6   | 10358477 | rs116443000 | T             | 2.22 | 1.63E-07 | Intergenic   |
| 9   | 78131027 | rs73650172  | G             | 1.22 | 4.25E-07 | Intergenic   |
| 9   | 1.25E+08 | rs181518405 | A             | 1.85 | 3.90E-07 | LHX6         |
| 10  | 1.35E+08 | rs146777408 | T             | 1.34 | 3.34E-07 | CFAP46       |
| 12  | 1.07E+08 | rs11610873  | C             | 0.75 | 2.64E-07 | LOC100287944 |
| 20  | 45165858 | rs202380    | T             | 0.86 | 2.98E-07 | near OCSTAMP |
| 20  | 59454012 | rs34197461  | A             | 1.33 | 2.71E-07 | near CDH4    |

**Supplementary Table 4:** Associations between variants with minor allele frequency less than 0.01 in the full meta-analysis (MVP ADRD, MVP proxy dementia, and ADGC AD).

| SNP         | Effect allele | ADRD OR | ADRD P   | Proxy P  | MVP P    | ADGC P   | Meta P   | Dir | MAF   | r2   |
|-------------|---------------|---------|----------|----------|----------|----------|----------|-----|-------|------|
| rs569876967 | A             | 1.56    | 1.89E-01 | 1.51E-08 | 1.86E-07 | NA       | 1.86E-07 | ++? | 0.002 | 0.70 |
| rs115837776 | T             | 1.92    | 2.77E-02 | 7.07E-05 | 7.83E-06 | 5.83E-03 | 2.07E-07 | +++ | 0.002 | 0.72 |
| rs117435266 | A             | 2.15    | 2.82E-03 | 3.93E-05 | 3.91E-07 | NA       | 3.91E-07 | ++? | 0.002 | 0.90 |
| rs567572378 | A             | 1.89    | 2.21E-04 | 2.63E-04 | 2.42E-07 | NA       | 2.42E-07 | ++? | 0.006 | 0.75 |
| rs73581622  | A             | 1.58    | 2.24E-03 | 3.73E-05 | 2.94E-07 | 6.98E-01 | 4.98E-06 | ++- | 0.006 | 0.86 |
| rs116329346 | A             | 1.66    | 7.93E-04 | 9.13E-05 | 2.57E-07 | 6.97E-01 | 4.46E-06 | ++- | 0.007 | 0.77 |
| rs145008711 | A             | 0.63    | 3.03E-03 | 4.67E-05 | 4.94E-07 | 8.97E-01 | 4.75E-06 | --+ | 0.007 | 0.76 |

The direction of effect represents the direction of the effect allele in the MVP ADRD, MVP proxy, and the ADGC AD GWASs, in that order.

**Supplementary table 5:** Suggestive ( $p < 5 \times 10^{-7}$ ) associations between common variants in the APOE-adjusted meta analysis (MVP ADRD and ADGC AD)

| Chr | POS       | SNP         | Effect Allele | P        | Dir | Gene         |
|-----|-----------|-------------|---------------|----------|-----|--------------|
| 6   | 41136086  | rs73427289  | T             | 8.25E-08 | ++  | LOC105375056 |
| 8   | 119904557 | rs10955908  | A             | 3.24E-07 | --  | Intergenic   |
| 9   | 13220518  | rs141610415 | T             | 4.27E-07 | ?-  | Intergenic   |
| 11  | 43166842  | rs569584007 | T             | 8.81E-08 | ?-  | Intergenic   |
| 12  | 106951385 | rs114572990 | A             | 4.97E-07 | -?  | Near TTC17   |
| 15  | 97992685  | rs570487962 | A             | 1.69E-09 | ?+  | LINC02254    |
| 17  | 72273608  | rs9893381   | A             | 4.89E-07 | ++  | DNAI2        |

The direction of effect represents the direction of the effect allele in the MVP ADRD and ADGC AD APOE-adjusted GWASs, in that order.

**Supplementary Table 6:** Associations between common, coding variants in LD with suggestive ( $p < 5.0 \times 10^{-7}$ ) variants in the MVP-ADGC AFR meta-analysis

| Chr | Pos      | Effect | Alternate | Pvalue    | Direction | SNP         | Gene   |
|-----|----------|--------|-----------|-----------|-----------|-------------|--------|
|     |          | Allele | Allele    |           |           |             |        |
| 6   | 41126655 | A      | G         | 4.64E-09  | ---       | rs2234256   | TREM2  |
| 6   | 41129105 | T      | G         | 2.23E-07  | ++?       | rs2234253   | TREM2  |
| 19  | 1000665  | A      | G         | 7.12E-07  | +++       | rs144440136 | GRIN3B |
| 19  | 1047336  | A      | G         | 3.22E-08  | +++       | rs59851484  | ABCA7  |
| 19  | 1058635  | T      | C         | 4.40E-10  | +++       | rs73505232  | ABCA7  |
| 19  | 45391454 | T      | C         | 4.94E-06  | +++       | rs145654351 | PVRL2  |
| 19  | 45404579 | T      | G         | 8.63E-62  | +++       | rs394819    | APOE   |
| 19  | 45409167 | C      | G         | 3.21E-07  | ---       | rs7122067   | APOE   |
| 19  | 45411941 | T      | C         | 6.09E-150 | ---       | rs429358    | APOE   |
| 19  | 45412079 | T      | C         | 5.02E-12  | ---       | rs7412      | APOE   |

The direction of effect represents the direction of the effect allele in the MVP ADRD, MVP proxy, and the ADGC AD GWASs, in that order.

Supplementary table 7. SNPs with regulatory effects in African ancestry Cortex tissue according to the Metabrain Network database

| Chr | Pos      | rsID*       | Effect | Alternate | Gene   | P eQTL   | FDR eQTL | eQTL | Z        | P        |
|-----|----------|-------------|--------|-----------|--------|----------|----------|------|----------|----------|
|     |          |             |        |           |        |          |          |      | Dementia | Dementia |
|     |          |             | Allele | Allele    |        |          |          |      | GWAS     | Meta     |
| 8   | 10278248 | rs12677754  | a      | g         | PRSS51 | 1.08E-15 | 0        | -8.0 | 4.14     | 3.45E-05 |
| 8   | 10279483 | rs10113408  | c      | g         | PRSS51 | 4.11E-17 | 0        | -8.4 | -4.9     | 9.83E-07 |
| 8   | 10279503 | rs10112584  | a      | g         | PRSS51 | 6.4E-17  | 0        | -8.4 | 4.88     | 1.09E-06 |
| 8   | 10279626 | rs4607615   | c      | g         | PRSS51 | 3.6E-17  | 0        | -8.4 | -5.38    | 7.37E-08 |
| 8   | 10280217 | rs11250006  | a      | t         | PRSS51 | 1.73E-13 | 0        | -7.4 | -4.5     | 6.95E-06 |
| 8   | 10280818 | rs6985267   | a      | c         | PRSS51 | 3.18E-15 | 0        | -7.9 | -4.53    | 5.99E-06 |
| 8   | 10283233 | rs34629088  | a      | t         | PRSS51 | 5.51E-11 | 0        | -6.6 | -3.15    | 1.62E-03 |
| 8   | 10283761 | rs3750313   | a      | g         | PRSS51 | 2.5E-11  | 0        | -6.7 | 3.04     | 2.37E-03 |
| 8   | 10285497 | rs11250008  | t      | c         | PRSS51 | 9.28E-22 | 0        | -9.6 | 4.26     | 2.03E-05 |
| 8   | 10285810 | rs3750314   | t      | c         | PRSS51 | 1.6E-22  | 0        | -9.8 | -4.44    | 8.94E-06 |
| 19  | 991171   | rs114066284 | t      | g         | CNN2   | 7.42E-06 | 5.47E-02 | -4.5 | 2.55     | 1.09E-02 |
| 19  | 1004709  | rs76827013  | a      | g         | ABCA7  | 4.08E-07 | 4.75E-03 | -5.1 | -4.43    | 9.24E-06 |
| 19  | 1005186  | rs61740285  | a      | g         | ABCA7  | 3.97E-07 | 4.65E-03 | -5.1 | 4.47     | 7.88E-06 |
| 19  | 1010027  | rs77386938  | a      | t         | ABCA7  | 3.31E-07 | 3.87E-03 | -5.1 | -5.06    | 4.27E-07 |
| 19  | 1010115  | rs116247697 | t      | c         | ABCA7  | 3.2E-07  | 3.69E-03 | -5.1 | 5.1      | 3.44E-07 |
| 19  | 1010183  | rs115454056 | t      | c         | ABCA7  | 3.2E-07  | 3.69E-03 | -5.1 | 5.09     | 3.55E-07 |
| 19  | 1012024  | rs114980668 | c      | g         | ABCA7  | 3.27E-07 | 3.80E-03 | -5.1 | -5.11    | 3.23E-07 |
| 19  | 1013963  | rs114895164 | a      | g         | ABCA7  | 2.62E-07 | 3.19E-03 | -5.1 | 5.18     | 2.18E-07 |
| 19  | 1022261  | rs142732532 | c      | g         | ABCA7  | 1.29E-06 | 1.30E-02 | -4.8 | 5.23     | 1.73E-07 |
| 19  | 1024909  | rs114555712 | a      | g         | ABCA7  | 2.64E-07 | 3.22E-03 | -5.1 | -5.05    | 4.39E-07 |
| 19  | 1050420  | rs115550680 | a      | g         | ABCA7  | 1.78E-07 | 2.36E-03 | -5.2 | -5.7     | 1.17E-08 |

\*SNPs in bold are independent lead SNPs in the region in the GWAS.

# The Z-scores for A/T and G/C SNPs are not possible to compare in the eQTL and GWAS results due to strand ambiguity



**Supplementary Figure 1:** Plot of the first two principal components of ancestry in MVP AFR participants relative to 1000 Genomes reference populations

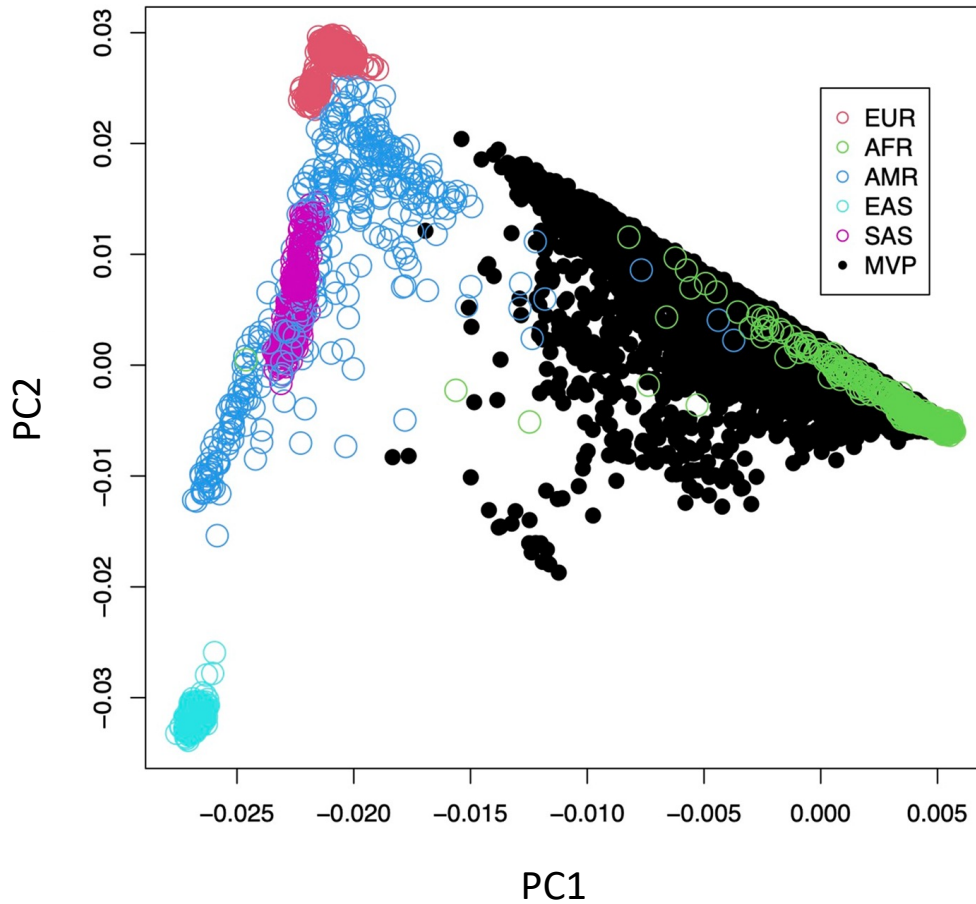

AFR=African, EUR=European, SAS=South Asian, EAS=East Asian, AMR=admixed American, MVP=Million Veterans Project HARE-defined African Ancestry Participants

**Supplementary Figure 2: Ancestry Plot** (proportion of ancestry) relative to 1000 Genomes reference samples for MVP HARE-defined AFR participants. Sorted in order of estimated % African Ancestry. Blue=African Ancestry (YRI and LWK), Orange=European Ancestry (GBR), Red=American Ancestry (PEL), Green = Asian Ancestry (CHB).

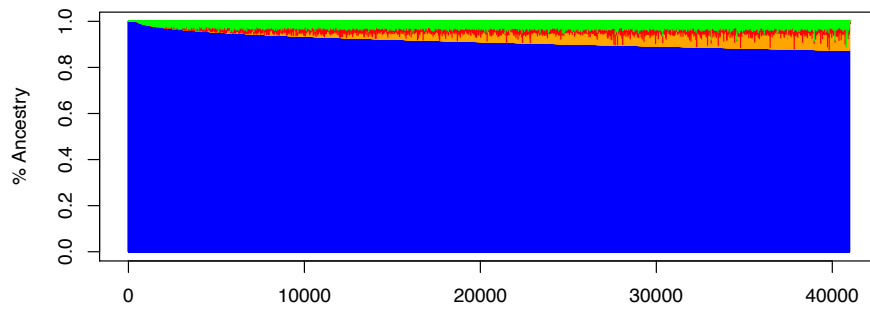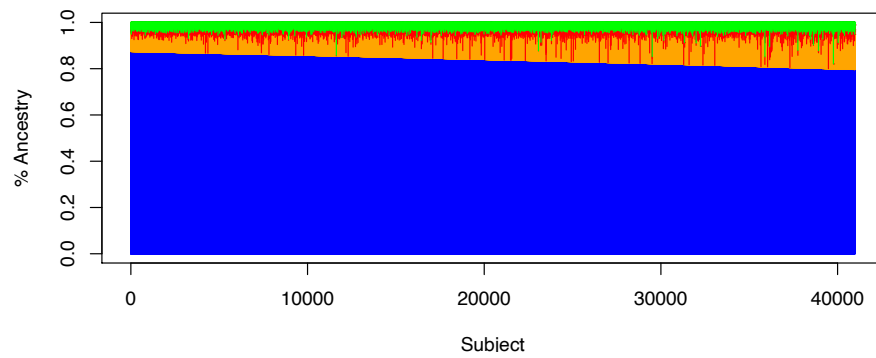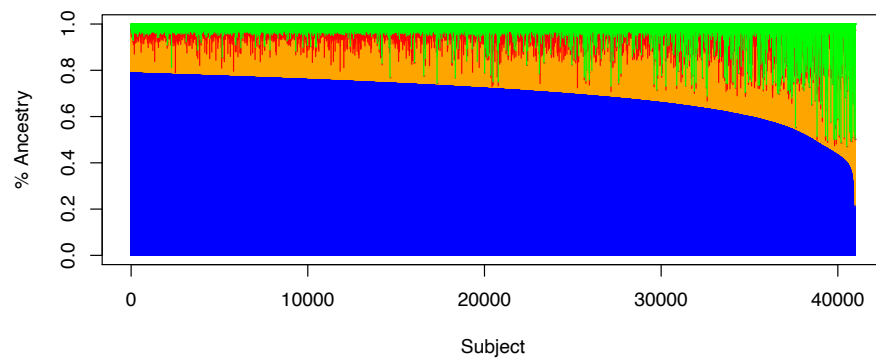

### Supplementary Figure 3: Regional Manhattan plots for the two non-APOE regions containing genome-wide significant associations in MVP AFR ADRD case-control analysis.

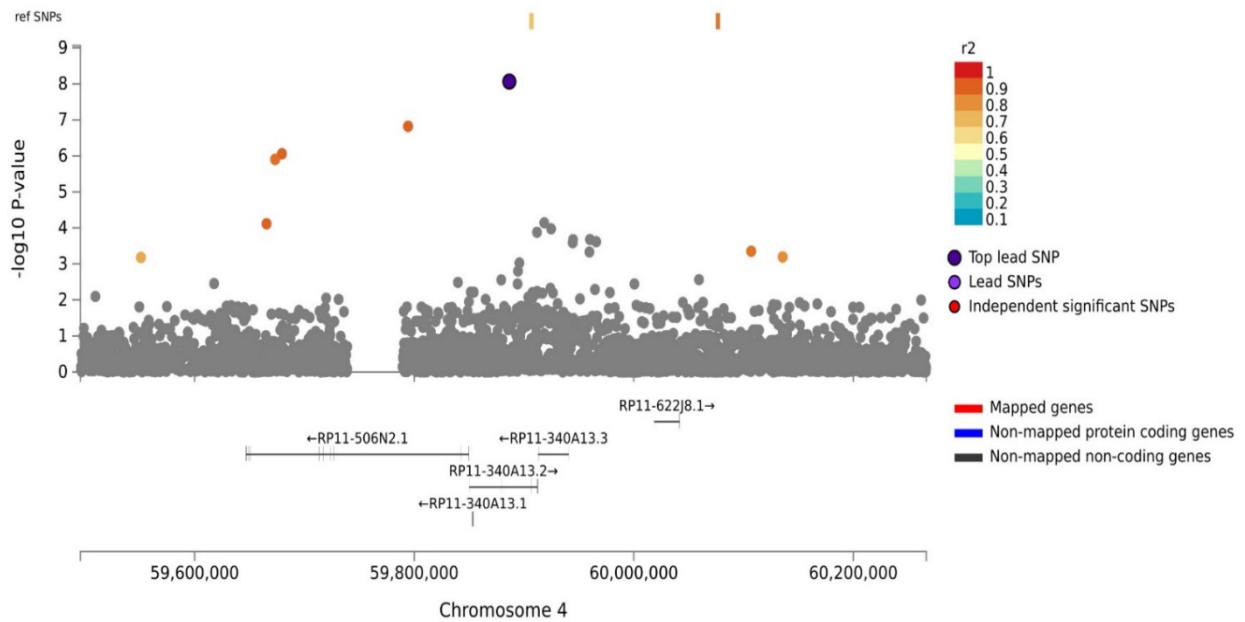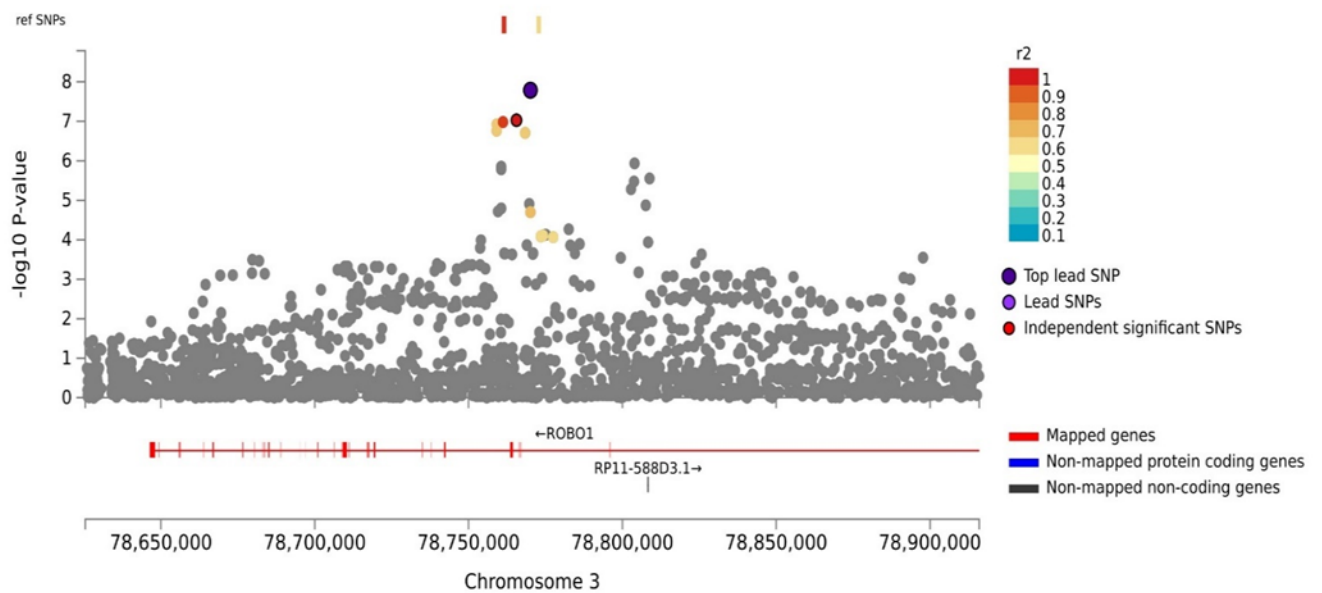

**Supplementary Figure 4: Regional Manhatten plots for the three non-APOE regions containing genome-wide significant associations in the full meta-analysis (MVP ADRD, MVP proxy, and ADGC AD GWASs).**

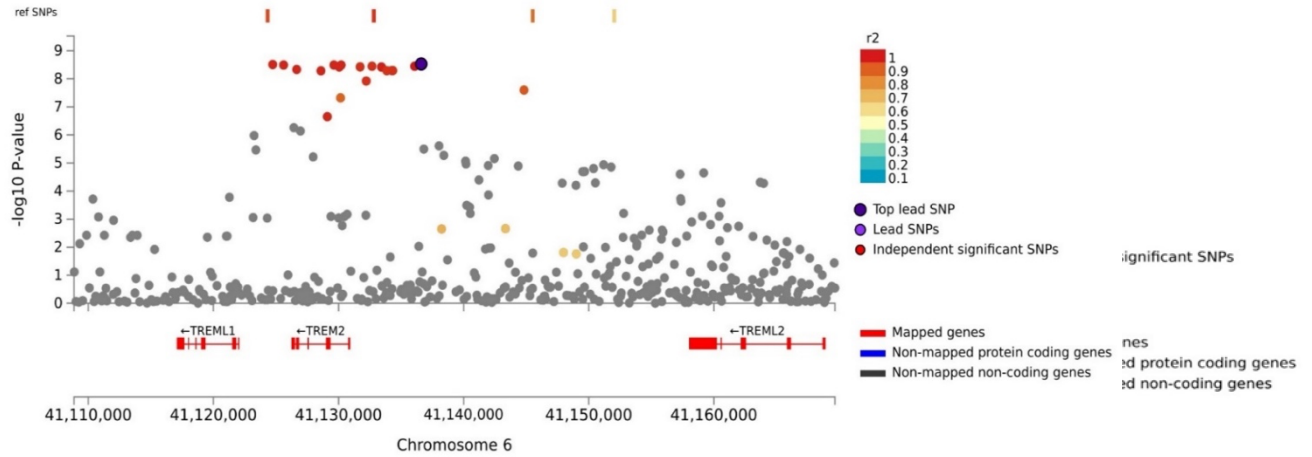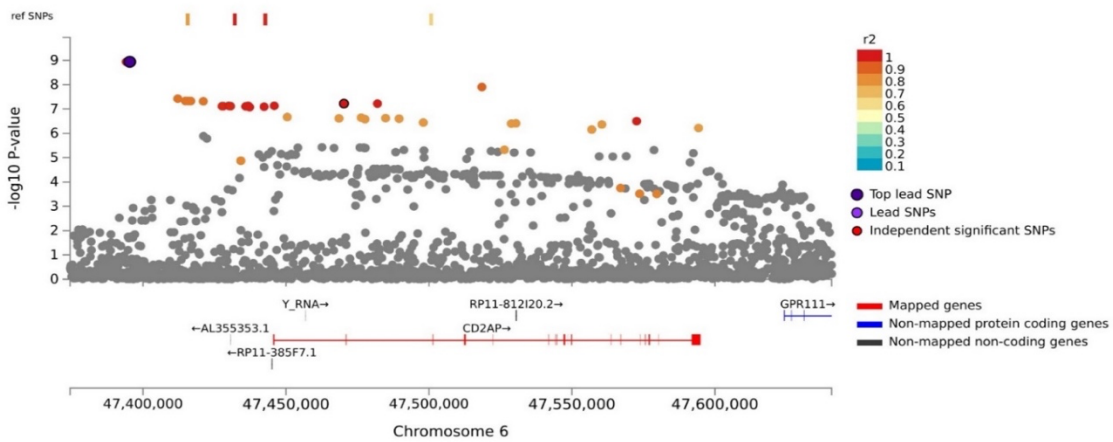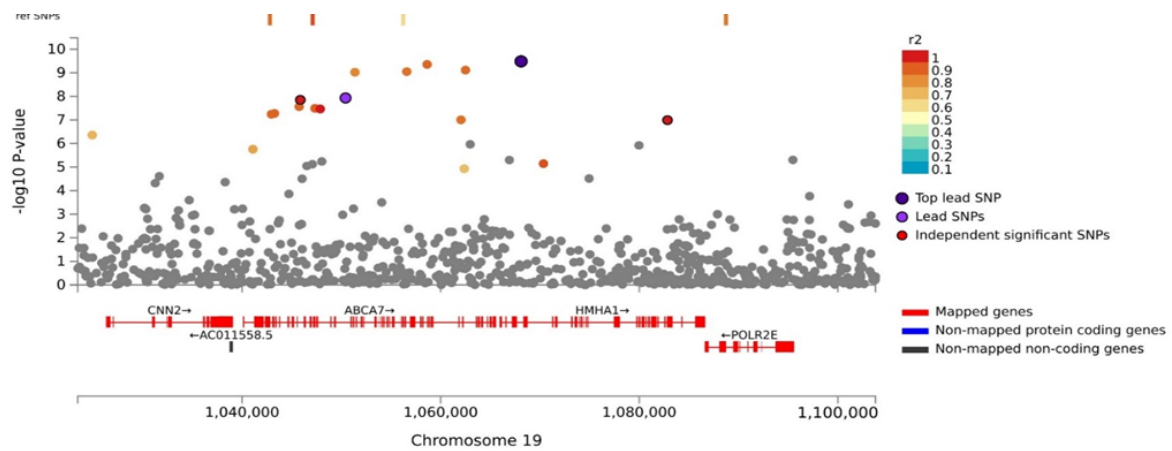

**Supplementary Figure 5: Regional Manhattan plots for the MRSA and SORL1 regions in the full meta-analysis (MVP ADRD, MVP proxy, and ADGC AD GWASs).**

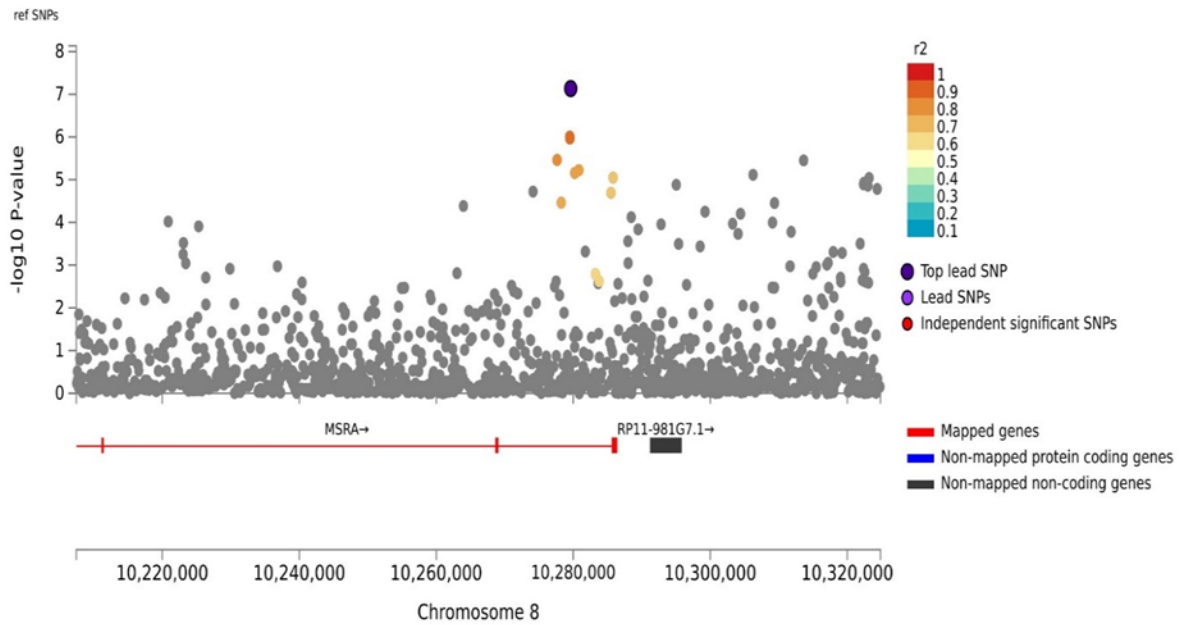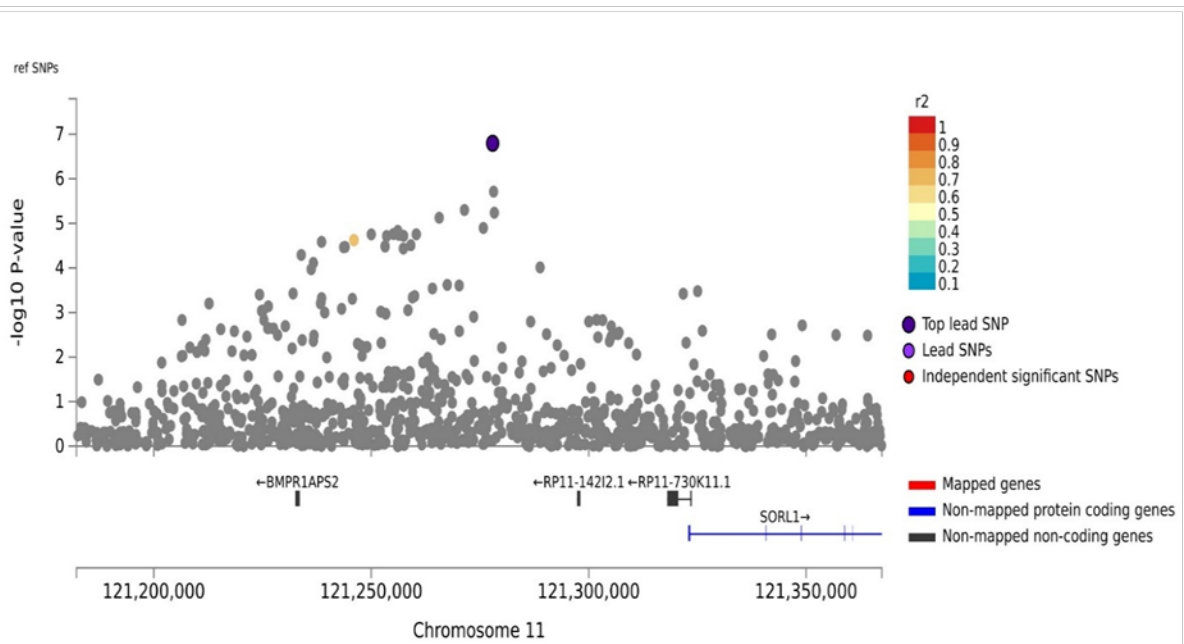

**Supplementary Figure 6:** Canonical pathways with significant enrichment of association signals in the MVP/ADGC meta-analysis.

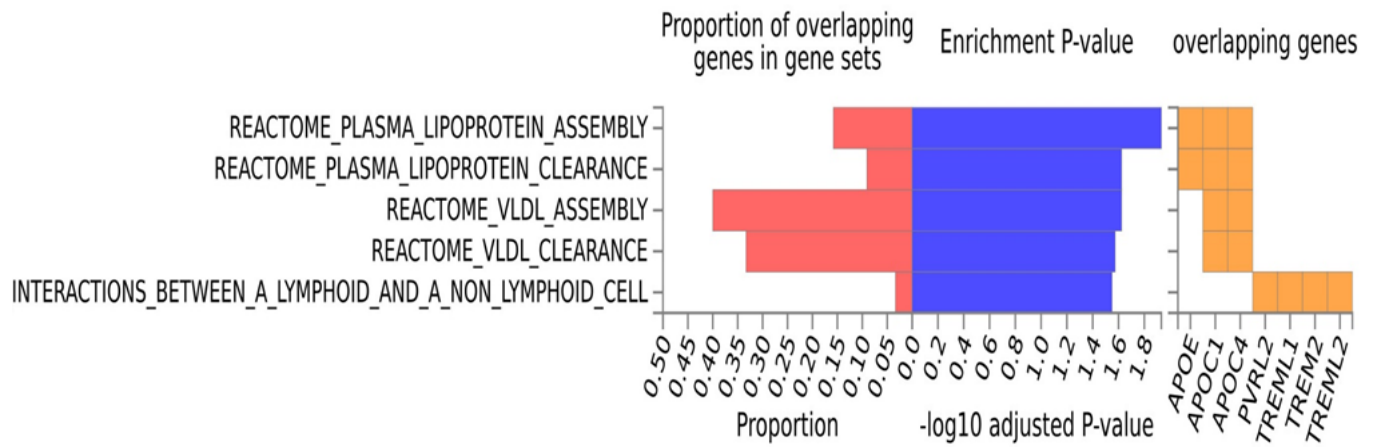

Supplement: NIHMS1869213-supplement-Supplementary_Materials.pdf [file NIHMS1869213-supplement-Supplementary_Materials.pdf]
